# Supplementary material for: Personalized neoadjuvant strategy using 70-gene assay in ER-positive/HER2- negative breast cancer to increase breast-conserving surgery rate (KBCSG016: PLATO trial)
Source: Research Square preprint supplement (doi:10.21203/rs.3.rs-6287262/v1), 2025-05-05
Supplement: Supplementary file 1 [file 6b8b9370596b75a88b550018.docx]

eTable 1. Rate of achieving target size and actual breast conserving rate stratified by menopausal status

|  | | premenopausal (n=59) | | postmenopausal (n=33) | |
| --- | --- | --- | --- | --- | --- |
| n | Rate (%) [95% CI] | n | Rate (%) [95% CI] |
| Rate of achieving target size | High risk | 44 | 72.7% [57.2, 85.0] | 24 | 75.0% [53.3, 90.2] |
| Low risk | 15 | 53.3% [26.6, 78.7] | 9 | 66.7% [29.9, 92.5] |
| Actual breast conserving surgery rate | High risk | 44 | 61.4% [45.5, 75.6] | 24 | 70.8% [48.9, 87.4] |
| Low risk | 15 | 40.0% [16.3, 67.7] | 9 | 55.6% [21.2, 86.3] |

eTable 2. Number of adverse events in each therapy group

|  | High risk, neoadjuvant chemotherapy | Low risk, neoadjuvant endocrine therapy | total |
| --- | --- | --- | --- |
| Grade 1 (mild) | 90 | 7 | 97 |
| Grade 2 (moderate) | 32 | 2 | 34 |
| Grade 3 (severe & undesirable) | 9 | 0 | 9 |
| Grade 4 (life threatening or disabling) | 2 | 0 | 2 |
|  | 133 | 9 | 142 |

* The adverse events occurred in 51.5% (35/68) of high risk patients and 29.2% (7/24) of low risk patients

eTable 3. Factors associated with the achievement of target size

|  |  | univariate anlaysis | | |
| --- | --- | --- | --- | --- |
|  |  | OR | 95%CI | p-value |
| clinical T stage | T2 | 1 |  |  |
|  | T3 | 0.58 | [0.16 : 2.11] | 0.38 |
| clinical N stage | N0 | 1 |  |  |
|  | N+ | 0.76 | [0.31 : 1.86] | 0.55 |
| pretreatment PgR | negative | 1 |  |  |
|  | positive | 1.36 | [0.33 : 4.94] | 0.65 |
| pretreatment HG | low grade (HG1, HG2) | 1 |  |  |
|  | high grade (HG3) | 1.11 | [0.33 : 4.37] | 0.87 |
| Ki67≥10 |  | 1.46 | [0.60 : 3.60] | 0.4 |
| risk group | high risk group | 1 |  |  |
|  | low risk group | 0.5 | [0.19 : 1.35] | 0.17 |

Abbreviations: PgR, progesterone receptor; HG, histologic grade
