# Supplementary material for: Personalized neoadjuvant strategy using 70-gene assay in ER-positive/HER2- negative breast cancer to increase breast-conserving surgery rate (KBCSG016: PLATO trial)
Source: Research Square preprint supplement (doi:10.21203/rs.3.rs-6287262/v1), 2025-05-05
Supplement: Supplementary file 2 [file ee5651007e6b61cd2722d1a2.docx]

----------------------------------------------------------------------------------------------

**P**ersonalized neoadjuvant strategy in **L**uminal **A** breast cancer **TO** increase BCS rate

**[PLATO Study]**

Multi-institutional Study to increase breast conserving surgery (BCS) rate with personalized neoadjuvant strategy in luminal A breast cancer patients for whom BCS is not feasible

----------------------------------------------------------------------------------------------

**Clinical Trial Protocol**

**Version 4.2**

**Date of revision: Sep, 23, 2021**

**Table of Contents**

[**Abbreviation definitions** 4](#_Toc164079554)

[**Summary of Clinical Trial Protocol** 6](#_Toc164079555)

[**1. Title of Trial** 8](#_Toc164079556)

[**2. Trial Institutions and Investigators** 8](#_Toc164079557)

[**3. Background and Objectives** 8](#_Toc164079558)

[3.1 Background 8](#_Toc164079559)

[3.2. Objectives 9](#_Toc164079560)

[3.2.1. Primary endpoint: 9](#_Toc164079561)

[3.2.2. Secondary endpoint: 9](#_Toc164079562)

[3.2.3. Exloratory outcome analysis: 9](#_Toc164079563)

[**4. Information and management of investigational medicinal products** 10](#_Toc164079564)

[4.1 Dosage form 10](#_Toc164079565)

[4.2. Labeling of Investigational Medicinal Products 10](#_Toc164079566)

[4.3. Supply, storage, and recovery of investigational medicinal Products 10](#_Toc164079567)

[4.3.1. Supply and storage of investigational medicinal products 10](#_Toc164079568)

[4.3.2. Recovery of investigational medicinal products 10](#_Toc164079569)

[**5. Inclusion & Exclusion Criteria** 10](#_Toc164079570)

[5.1. Inclusion criteria 10](#_Toc164079571)

[5.2. Exclusion criteria 11](#_Toc164079572)

[**6. Number of participants targeted and rationale** 11](#_Toc164079573)

[6.1. Number of participants targeted 11](#_Toc164079574)

[6.2. Calculation rationale 11](#_Toc164079575)

[**7. Subject recruitment plan** 11](#_Toc164079576)

[**8. Study methods** 12](#_Toc164079577)

[8.1. Subject identification 12](#_Toc164079578)

[8.2. Screening tests and evaluations 12](#_Toc164079579)

[8.3. Evaluation and documentation of the feasibility of breast conserving surgery 13](#_Toc164079580)

[8.4. Multi-gene prognostic prediction tool (MammaPrint) 13](#_Toc164079581)

[8.5. Administration of chemotherapy and endocrine therapy 13](#_Toc164079582)

[8.5.1. Arm I (MammaPrint high-risk group): 13](#_Toc164079583)

[8.5.2. Arm II (MammaPrint low-risk group): 13](#_Toc164079584)

[8.6. Examinations and dose adjustments during neoadjuvant chemotherapy 13](#_Toc164079585)

[8.6.1. Examinations during neoadjuvant chemotherapy 13](#_Toc164079586)

[8.6.2. Dose adjustments during neoadjuvant chemotherapy 14](#_Toc164079587)

[8.7. Examinations and precautions during neoadjuvant endocrine therapy 14](#_Toc164079588)

[8.8. Examinations at the end of neoadjuvant chemotherapy/endocrine therapy 14](#_Toc164079589)

[8.9. Criteria for treatment discontinuation or dropout 15](#_Toc164079590)

[8.10. Assessment of treatment effect and response 15](#_Toc164079591)

[8.10.1. Evaluation of Response after Neoadjuvant Chemotherapy (RECIST Ver. 1.1) 15](#_Toc164079592)

[8.10.2. Definition of disease-free survival and overall survival 16](#_Toc164079593)

[8.10.3. Evaluation of Toxicity 16](#_Toc164079594)

[8.11. Surgical treatment 16](#_Toc164079595)

[8.12. Postoperative adjuvant therapy 16](#_Toc164079596)

[8.13. Radiation therapy 16](#_Toc164079597)

[8.14. Postoperative follow-up 16](#_Toc164079598)

[**9. Statistical analysis** 17](#_Toc164079599)

[9.1. Statistical objectives 17](#_Toc164079600)

[9.2. Definition of analysis sets 17](#_Toc164079601)

[9.2.1. FA (Full Analysis) set 17](#_Toc164079602)

[9.2.2. PP (Per Protocol) set 17](#_Toc164079603)

[9.3. Efficacy evaluation variables 17](#_Toc164079604)

[**10. Guidelines for safety** 17](#_Toc164079605)

[10.1. Definitions of safety-related terms 17](#_Toc164079606)

[10.2. Evaluation method and recording of adverse events 18](#_Toc164079607)

[10.3. Criteria for evaluating the severity of adverse events 18](#_Toc164079608)

[10.4. Causality 19](#_Toc164079609)

[**11. Funding** 19](#_Toc164079610)

[**12. Conflict of interest** 19](#_Toc164079611)

[**13. References** 20](#_Toc164079612)

# Abbreviation definitions

ABCSG Austrian Breast & Colorectal Cancer Study Group

ADR Adverse Drug Reaction

AE Adverse Event

AI Aromatase Inhibitor

ALT(SGPT) Alanine aminotransferase

ANC Absolute Neutrophil Count

AST(SGOT) Aspartate aminotransferase

BCS Breast Conserving Surgery

BUN Blood Urea Nitrogen

CR Complete Response

CRF Case Report Form

CT Computerized Tomography

CTCAE Common Terminology criteria for adverse events

DFS Disease-Free Survival

E2 Estradiol

ECG Electrocardiogram

ECOG Eastern Cooperative Oncology Group

EOT End of Treatment

EP EndoPredict

ER Estrogen Receptor

ESMO European Society for Medical Oncology

FAS Full Analysis Set

FDA Food and Drug Administration

FISH Fluorescence in situ hybridization

FSH Follicle Stimulating Hormone

GCP Good Clinical Practice

GnRH Gonadotropin Releasing Hormone

Hb Hemoglobin

HER2 Human Epidermal Growth Factor Receptor 2

HR Hormone receptor

IBTR Ipsilateral Breast Tumor Recurrence

ICH-GCP International Conference on Harmonization- Good Clinical Practice

IHC Immunohistochemistry

IRB Institutional Review Board

ITT Intention To Treat

LDH Lactate Dehydrogenase

LHRH Luteinizing hormone-releasing hormone

MRI Magnetic Resonance Imaging

MUGA Multigated Blood Pool Scan

NCCN The National Comprehensive Cancer Network

NCI-CTCAE National Cancer Institute Common Terminology Criteria for Adverse Events

OP Operation

OS Overall Survival

pCR Pathological Complete Response

PD Progressive Disease

PET Positron Emission Tomography

PgR Progesterone Receptor

PLT Platelet

PP Per Protocol

PR Partial Response

PR Progesterone Receptor

PS Performance Status

RECIST Response Evaluation Criteria in Solid Tumors

SAE Serious Adverse Event

SAR Serious Adverse Reaction

SD Stable Disease

SISH Silver enhanced in situ Hybridization

ULN Upper Limit of Normal

US Ultrasonography

WBC White Blood Cel

**Management Principles of Clinical Trial**

This clinical trial will be conducted based on the principles of Good Clinical Practice and Korea Good Clinical Practice of KFDA (Korea Food & Drug Safety).

# Summary of Clinical Trial Protocol

**1. Objectives**

In ER-positive, HER2-negative breast cancer patients for whom breast-conserving surgery (BCS) is not feasible, we investigate whether the rate of BCS can be increased while decreasing unnecessary chemotherapy through selective neoadjuvant chemotherapy or neoadjuvant endocrine therapy using a multigene assay tool.

**2. Trial classification** : Prospective, multi-institutional phase 2 trial

**3. Eligible Patients**: treatment-naïve, pre- or post-menopausal, Stage I-IIIA, ER-positive, HER2-negative breast cancer patients for whom BCS is not feasible due to tumor sizes or locations

**4. Targeted number of patients** : 122 patients (4 institutions)

**5. Trial period** : 8 years after getting approval of IRB

**6. Trial drug administration**

Arm I (MammaPrint High Risk group):

According to institutional guidelines, neoadjuvant chemotherapy can be selectively performed, and the chemotherapy regimens are either AC#4 followed by Docetaxel#4 or AC#4 followed by weekly Paclitaxel#12.

Arm II (MammaPrint Low Risk group):

Pre-menopausal patients: Letrozole 2.5mg PO QD+ leuprorelin 3.75mg SQ every 4 weeks during 16weeks

Post-menopausal patients: Letrozole 2.5mg PO QD during 16weeks

- Diagnosis of menopause is defined as no menstruation for 1-year or both ovaries removed surgically

**7. Inclusion Criteria**

1) Histopathologically and immunohistochemically confirmed ER+ and HER2- BC patients

2) Stage I-IIIA BC patients with detectable tumor sizes

3) BC patients for whom BCS is not feasible due to tumor size or location (the infeasibility of BCS is assessed by two surgeons at the central institution)

4) Patients without distant metastasis which were identified pathologically or radiologically

5) Female patients ≥ 19 years

6) ECOG 0-2

7) Patients with adequate bone marrow function

- Hemoglobin 10 g/dL, ANC 1,500/mm3, Plt 100,000/mm3

8) Patients with adequate kidney function

- serum Cr ≤ 1.5 mg/dL

9) Patients with adequate liver function

- Bilirubin: ≤ 1.5 times of upper normal limit

- AST/ALT: ≤ 1.5 times of upper normal limit

- Alkaline phosphatase: ≤ 1.5 times of upper normal limit

10) Patients who decided to voluntarily participate in this trial with written informed consent

**8. Exclusion Criteria**

1) History of treatment for previous breast cancer or breast carcinoma in situ

2) Confirmed distant metastasis of BC

3) Patients with a history of cancers other than breast cancer (except for treated non-melanoma skin cancer, treated cervical cancer, or thyroid cancer with no recurrence within 5 years after surgery) within the past 5 years.

4) Pregnant (positive pregnancy test within a week of enrollment) or breast-feeding patients

5) Uncontrolled severe infection

6) Psychiatric illness or epilepsy

7) Inability to understand and willingness to sign a written informed consent

8) Patients with diffuse microcalcifications observed on mammography

9) Multicentral or bilateral BC

10) Patients with a history of hypersensitivity reactions to the components of the investigational drug or LHRH analogues

11) Patients diagnosed with pituitary adenoma

12) Patients deemed by the investigator to be at high risk for fractures or osteoporosis

**9. Methodology**

1) Enrollment of study subjects

Female patients aged 19 years or older diagnosed with ER-positive and HER2-negative breast cancer (stage IIIA) whose tumor size is measurable but breast-conserving surgery is inappropriate due to the size or location of the tumor

Patients with no systemic metastasis confirmed pathologically or radiologically

Patients who can provide tumor tissue or slides for the Mammaprint test

The feasibility of breast-conserving surgery will be assessed by two designated central institutions.

The central institutions will review the imaging data (mammography, breast MRI, or chest CT) and provide feedback to the participating institutions regarding the feasibility of breast-conserving surgery.

Additional information, such as palpation findings, may be requested by the central institutions to make this assessment.

If the two central institutions provide inconsistent results, a third party (a physician or a designated evaluator) will be granted the authority to evaluate and make the final decision.

2) Preoperative chemotherapy/endocrine therapy and examinations

All enrolled study subjects will undergo the Mammaprint test to classify them into high-risk and low-risk groups, and the Blueprint test will be conducted to determine the subtype.

After the completion of drug administration, response will be evaluated using breast magnetic resonance imaging (MRI) or chest CT, mammography, and breast ultrasonography.

Examinations performed during preoperative chemotherapy and endocrine therapy will be conducted according to institutional guidelines.

3) Efficacy evaluation

Primary endpoint:

Conversion rate from BCS-ineligible to BCS-eligible patients

Secondary endpoint:

Actual performance rate of BCS

Pathological complete response (pCR)

Clinical response rate (cCR)

Exloratory outcome analysis

Disease Free Survivals (DFS)

Response rate by Blueprint subtype

4) Safety assessment

Physical examinations, vital signs, and performance status will be checked at each visit. Abnormal values from various tests collected for research purposes and all adverse events will be evaluated according to the NCI-CTCAE Version 5.0 criteria.

**10. Expected effects and anticipated Results**

It is expected that selective preoperative chemotherapy or endocrine therapy can increase the rate of breast conservation while reducing the use of unnecessary chemotherapy. Previous studies on Korean patients with hormone receptor-positive and HER2-negative breast cancer have shown a conversion rate of 35.8% from ineligibility to eligibility for breast-conserving surgery after neoadjuvant chemotherapy. This study anticipates that by using a selective approach with preoperative chemotherapy or endocrine therapy, the conversion rate will increase by 15%, resulting in a rate of 50.8%.

**Clinical Trial Protocol**

# 1. Title of Trial

Personalized neoadjuvant strategy in Luminal A breast cancer TO increase BCS rate (PLATO study)

# 2. Trial Institutions and Investigators

**1) Principal investigator:** Seoul National University Hospital / Dr. Wonshik Han

**2) Co-investigator:**

Asan Medical Center/Dr. Byung Ho Son

Korea Cancer Center Hospital / Dr. Hyun Ah Kim

Seoul National University Bundang Hospital / Dr. Eun Kyu Kim

**3) Addresses of clinical trial institutions**

Seoul National University Hospital: 101 Daehak-ro, Jongno-gu, Seoul, Republic of Korea

Seoul National University Bundang Hospital: 82, Gumi-ro 173beon-gil, Bundang-gu, Seongnam-si, Gyeonggi-do, Republic of Korea

Asan Medical Center: 88 Olympic-ro 43-gil, Songpa-gu, Seoul, Republic of Korea

Korea Cancer Center Hospital: 75 Nowon-ro, Nowon-gu, Seoul, Republic of Korea

**4) Evaluators of Breast-Conserving Surgery Feasibility**

Central Institution: So-Youn Jung, Department of Breast Cancer Surgery, National Cancer Center

Central Institution: Byung Joo Chae, Department of Breast and Endocrine Surgery, Samsung Medical Center

Third-Party: Jun Won Min, Department of Surgery, Dankook University Hospital

# 3. Background and Objectives

## 3.1 Background

In patients with resectable BC, the neoadjuvant chemotherapy is recognized as one of the standard therapies for controlling and preventing micrometastasis and recurrence.

Conducting neoadjuvant chemotherapy can increase the rate of BCS compared to adjuvant chemotherapy, and patients who achieve a pathological complete response (pCR) after neoadjuvant chemotherapy are known to have a better prognosis than those who do not (1-3). The effect of neoadjuvant chemotherapy varies depending on the subtype of breast cancer. While the pCR rate is 67% in hormone receptor-negative, HER2-positive breast cancer, it is reported to be 37% in triple-negative breast cancer and 13% in hormone receptor-positive, HER2-negative breast cancer (4). Neoadjuvant chemotherapy shows only limited efficacy in hormone receptor-positive breast cancer, and the decline in quality of life and loss of fertility due to chemotherapy, especially in young women, is a significant socioeconomic loss (5).

The results of the SOFT trial showed that in high-risk premenopausal women, the group that received exemestane, an aromatase inhibitor (AI), and ovarian suppression simultaneously as adjuvant therapy had improved disease-free survival compared to the group that received tamoxifen and ovarian suppression (6). Neoadjuvant endocrine therapy, like neoadjuvant chemotherapy, has the advantage of converting inoperable tumors to operable ones or increasing the possibility of breast-conserving surgery in large breast cancers by reducing tumor size through complete or partial response (7). While the ultimate goal of these neoadjuvant systemic therapies is to reduce the recurrence rate and improve survival, overall survival and disease-free survival have been reported to be similar to adjuvant systemic therapies (8,9).

The overall clinical response rate of neoadjuvant endocrine therapy ranged from 13.5% to 100%, and the radiological response rate by ultrasound was 20%-91.7%. In estrogen receptor-positive breast cancer, neoadjuvant endocrine therapy showed a statistically similar response rate to neoadjuvant chemotherapy, and patients who received neoadjuvant chemotherapy had significantly higher side effects than those who received neoadjuvant endocrine therapy (7,10,11). The use of neoadjuvant endocrine therapy in ER-positive, HER2-negative patients is recommended by the NCCN guidelines and the St. Gallen Consensus Conference.

Most studies have been conducted on letrozole among AIs. Letrozole showed similar or slightly better results in clinical and radiological response rates compared to tamoxifen, and significantly more patients in the letrozole group were judged to have changed from an inoperable to an operable state or from requiring a mastectomy to being eligible for breast-conserving surgery after neoadjuvant endocrine therapy (12-15). In comparison studies among AIs, letrozole had the best response rate and the lowest breast-conserving surgery rate compared to anastrozole or exemestane, but the difference was not statistically significant (16).

Following the standard treatment guidelines suggesting selective use of ovarian function suppression therapy along with tamoxifen in hormone receptor-positive premenopausal breast cancer patients, a study was conducted combining letrozole with reversible ovarian ablation using goserelin, a luteinizing hormone-releasing hormone (LHRH) agonist (17). The results showed that, unlike in adjuvant endocrine therapy, the response rate was significantly better in the group that received goserelin and anastrozole together for 24 weeks compared to the group that received goserelin and tamoxifen together in premenopausal breast cancer patients (14,18). Representative LHRH agonists used in breast cancer include goserelin and leuprorelin (Leuplin). LHRH agonists ultimately desensitize the hypothalamus, reducing the secretion of LH and FSH, thereby suppressing ovarian function (19,20).

MammaPrint is an FDA-approved LDT analysis tool that analyzes 70 genes expressed in breast cancer tissue. It can classify patients into low-risk groups who can avoid chemotherapy and high-risk groups who can expect the benefit of chemotherapy, and it is currently used in clinical practice. Its usefulness and clinical results have been demonstrated by Cardoso et al., and the recent MINDACT trial proved that 46.2% of patients who were hormone receptor-positive and clinically high-risk were classified as low-risk by MammaPrint, allowing them to avoid chemotherapy (21).

At the 2017 San Antonio Breast Cancer Symposium, Dubsky et al. presented an analysis of the relationship between the response to neoadjuvant therapy and the results of the EndoPredict multigene assay in ER-positive, HER2-negative breast cancer patients from the ABCSG 34 trial. In the group that received neoadjuvant chemotherapy, patients with a low EP score (EndoPredict low-risk group) had a significantly smaller reduction in tumor size (NPV 100%). On the other hand, in the group that received neoadjuvant endocrine therapy, patients with a high EP score (EndoPredict high-risk group) had a significantly smaller reduction in tumor size (NPV 92%). These results suggest that the response to neoadjuvant chemotherapy and neoadjuvant endocrine therapy can be predicted based on the molecular score of the tumor, and selective treatment can maximize the effect. The NCCN Guidelines V3.2018 also recommend this test with Evidence Level 1.

Therefore, in this study, patients who are classified as genomic high-risk by the MammaPrint test will receive neoadjuvant chemotherapy, while those who are classified as low-risk will receive neoadjuvant endocrine therapy. Although there is limited evidence for chemotherapy in patients who have received neoadjuvant endocrine therapy, the NEOS study presented by Iwata et al. at the 2018 ESMO Congress showed that among patients who received neoadjuvant endocrine therapy, those with progressive disease (PD) had a significantly worse prognosis, while those with complete response (CR), partial response (PR), or stable disease (SD) had a favorable prognosis. Adjuvant therapy will be administered after the completion of this study, but based on the above-mentioned study, adjuvant chemotherapy will be performed only in cases of progressive disease (PD) after neoadjuvant endocrine therapy.

## 3.2. Objectives

In ER-positive, HER2-negative breast cancer patients for whom breast-conserving surgery (BCS) is not feasible, we investigate whether the rate of BCS can be increased while decreasing unnecessary chemotherapy through selective neoadjuvant chemotherapy or neoadjuvant endocrine therapy using a multigene assay tool.

### 3.2.1. Primary endpoint:

Conversion rate from BCS-ineligible to BCS-eligible patients

### 3.2.2. Secondary endpoint:

Actual performance rate of BCS

Pathological complete response (pCR)

Clinical response rate (cCR)

### 3.2.3. Exloratory outcome analysis:

Disease Free Survivals (DFS)

Response rate by Blueprint subtype

# 4. Information and management of investigational medicinal products

## 4.1 Dosage form

4.1.1. Leuplin® Injection (Leuplin® DPS Injection 3.75mg or Leuplin® Injection 3.75mg)

Product name:

1. Leuplin® DPS Injection 3.75mg, Takeda Pharmaceutical Company Korea
2. Leuplin® Injection 3.75mg, Takeda Pharmaceutical Company Korea

Generic name of the active ingredient: Leuprorelin acetate

Description:
① Leuplin® DPS Injection 3.75mg: A dual pre-filled glass syringe with an attached needle, consisting of a powder compartment containing a white lyophilized powder and a liquid compartment containing a colorless, transparent liquid. When the entire contents of the liquid compartment are transferred to the powder compartment and dissolved, it forms a white suspension.

1. Leuplin® Injection 3.75mg: A suspension vial and a vial filled with a white lyophilized powder.

4.1.2. Lenara Tablet

Product name: Lenara Tablet 2.5mg, Kwangdong Pharmaceutical Co., Ltd.

Generic name of the active ingredient: Letrozole

Description: Dark yellow, round, film-coated tablet

4.1.3. Bretra Tablet

Product name: Bretra Tablet 2.5mg, Shinpoong Pharmaceutical Co., Ltd.

Generic name of the active ingredient: Letrozole

Description: Dark yellow, round, film-coated tablet

## 4.2. Labeling of Investigational Medicinal Products

In accordance with the regulations related to investigational medicinal products, the following information should be included on the label:

The statement "For clinical trial use"

The product code name or generic name of the active ingredient

Lot number, expiration date, storage conditions

Manufacturer of the medicinal product

The person who received approval for the clinical trial plan

The statement "Cannot be used for purposes other than the clinical trial"

## 4.3. Supply, storage, and recovery of investigational medicinal Products

### 4.3.1. Supply and storage of investigational medicinal products

The delegated institution will provide the investigational medicinal products to the clinical trial sites for the completion of the clinical trial. The pharmacist in charge at each institution should check the quantity and condition of the medicinal products upon receipt and keep records of this information. Additionally, when dispensing the investigational medicinal products to subjects, the pharmacist should record the date and quantity dispensed and keep records of the details, including the date and quantity returned and disposed of.

### 4.3.2. Recovery of investigational medicinal products

At the end of the clinical trial, all unused medicinal products, including those not administered to subjects and those returned, will be recovered by the delegated institution of the supporting organization after confirmation by the investigator.

# 5. Inclusion & Exclusion Criteria

## 5.1. Inclusion criteria

1) Histopathologically and immunohistochemically confirmed ER+ and HER2- BC patients

2) Stage I-IIIA BC patients with detectable tumor sizes

3) BC patients for whom BCS is not feasible due to tumor size or location (the infeasibility of BCS is assessed by two surgeons at the central institution)

4) Patients without distant metastasis which were identified pathologically or radiologically

5) Female patients ≥ 19 years

6) ECOG 0-2

7) Patients with adequate bone marrow function

- Hemoglobin 10 g/dL, ANC 1,500/mm3, Plt 100,000/mm3

8) Patients with adequate kidney function

- serum Cr ≤ 1.5 mg/dL

9) Patients with adequate liver function

- Bilirubin: ≤ 1.5 times of upper normal limit

- AST/ALT: ≤ 1.5 times of upper normal limit

- Alkaline phosphatase: ≤ 1.5 times of upper normal limit

10) Patients who decided to voluntarily participate in this trial with written informed consent

## 5.2. Exclusion criteria

1) History of treatment for previous breast cancer or breast carcinoma in situ

2) Confirmed distant metastasis of BC

3) Patients with a history of cancers other than breast cancer (except for treated non-melanoma skin cancer, treated cervical cancer, or thyroid cancer with no recurrence within 5 years after surgery) within the past 5 years.

4) Pregnant (positive pregnancy test within a week of enrollment) or breast-feeding patients

5) Uncontrolled severe infection

6) Psychiatric illness or epilepsy

7) Inability to understand and willingness to sign a written informed consent

8) Patients with diffuse microcalcifications observed on mammography

9) Multicentral or bilateral BC

10) Patients with a history of hypersensitivity reactions to the components of the investigational drug or LHRH analogues

11) Patients diagnosed with pituitary adenoma

12) Patients deemed by the investigator to be at high risk for fractures or osteoporosis

# 6. Number of participants targeted and rationale

## 6.1. Number of participants targeted

This clinical trial aims to evaluate the primary endpoint, which is the conversion rate from breast-conserving surgery (BCS)-ineligible to BCS-eligible, by assessing up to 109 subjects. Accounting for a dropout rate of 10%, a total of 122 subjects will be enrolled in the study.

## 6.2. Calculation rationale

In a previous study conducted by the investigators, the conversion rate from breast-conserving surgery (BCS)-ineligible to BCS-eligible achieved by neoadjuvant chemotherapy in patients with ER-positive and HER2-negative breast cancer was 35.8% [1]. In this clinical trial, it is assumed that selective neoadjuvant chemotherapy or endocrine therapy will increase the conversion rate by 15%, resulting in a 50.8% conversion rate. The sample size was calculated using the following formula, with a power of 90% and a two-sided significance level of 5%.

(1) Research hypothesis

H0 (null hypothesis): The conversion rate to BCS-eligible status is 0.358 (p=0.358).

H1 (two-sided test): The conversion rate to BCS-eligible status is different from 0.358 (p≠0.358).

(2) Significance level (α): 0.05

(3) Type II error (β): 0.1

(4) Expected conversion rate (p): 0.508

(5) Sample size calculation results

Assuming an expected conversion rate (p) of 50.8% by selective neoadjuvant chemotherapy or endocrine therapy, and maintaining a power of 90% under a two-sided significance level of 5%, the required number of subjects is 109. Considering a dropout rate of 10%, the final required number of subjects is 122.

# 7. Subject recruitment plan

The primary target population will include all women who voluntarily visit the clinical trial sites after being diagnosed with breast cancer at the clinical trial sites or external hospitals and are scheduled to undergo surgery, who meet the inclusion criteria and do not meet the exclusion criteria. Among these women, those who voluntarily consent to participate in the study after receiving an explanation about the research will be included as study subjects. (Subject recruitment advertisements will not be used.)

# 8. Study methods


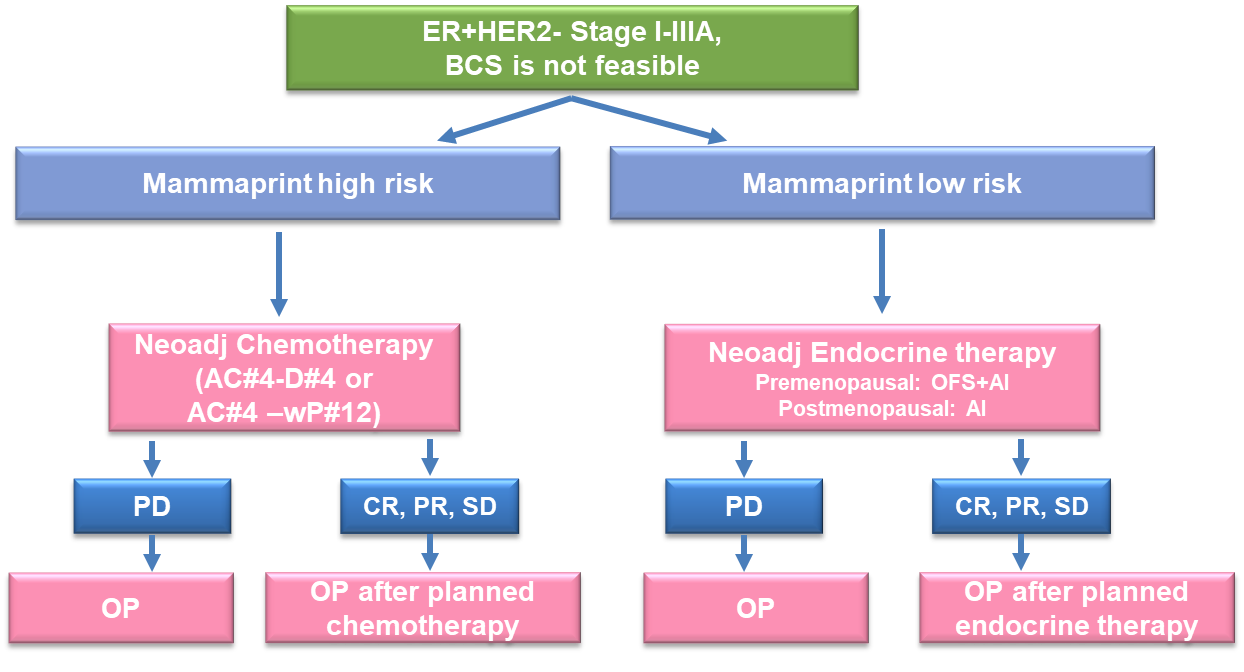


**[Figure 1] Overview of Study**

## 8.1. Subject identification

Confirm the patient has been diagnosed with invasive breast cancer, is not eligible for breast-conserving surgery at the time of diagnosis, has estrogen receptor-positive, HER-2-negative disease, has a clinical stage of I-IIIA, and has not previously been treated for breast cancer.

## 8.2. Screening tests and evaluations

- Obtain informed consent
- Assign a screening number
- Collect demographic information: subject initials, date of birth, age, gender
- Confirm pregnancy status: for women of childbearing potential, perform a pregnancy test using blood or urine
- Collect medical history (including history of breast cancer diagnosis, menopausal status (menopause is defined as the absence of menstruation for the past year or surgical removal of both ovaries), menstrual history, comorbidities (collect data on cancer within the past 5 years and other diseases within the past year))
- Measure vital signs, height, weight (including body surface area), and perform physical examination
- Assess performance status (ECOG performance status)
- Perform complete blood count: WBC, hemoglobin, PLT, ANC
- Perform comprehensive metabolic panel: calcium, phosphorus, glucose, uric acid, BUN, creatinine, cholesterol, protein, albumin, total bilirubin, alkaline phosphatase, AST, ALT, LDH
- Perform serum electrolyte tests: Na, K, Cl, CO2 (CO2 can be performed selectively at the investigator's discretion)
- Perform chest X-ray and ECG
- Measure E2 (estradiol) and assess HER-2 status
- Assess ER, PgR, and Ki-67
- Confirm the feasibility of breast-conserving surgery at the central institutions
- Perform MammaPrint test
- Perform mammography and breast ultrasound
- Perform breast MRI or chest CT (selectively at the investigator's discretion)
- Measure tumor markers (CA15-3)
- Perform whole-body bone scan and bone mineral density test
- Perform PET and MUGA scan/echocardiography (selectively at the investigator's discretion)

## 8.3. Evaluation and documentation of the feasibility of breast conserving surgery

Two central institutions will interpret the mammography, breast MRI, or chest CT imaging data to assess the feasibility of breast-conserving surgery and provide feedback to the participating institutions. At this time, additional information, including palpation findings, may be requested from the central institutions to confirm the feasibility of breast-conserving surgery. If the results received from the two central institutions are inconsistent, the authority to evaluate and make decisions will be granted to a third party (a physician or an evaluator designated by the head of the trial institution). Additionally, the surgeon will record the reasons why breast-conserving surgery is currently inappropriate and the target level at which conservation surgery may be possible in the future (e.g., if the tumor size decreases to less than a certain size after neoadjuvant therapy) before neoadjuvant therapy.

## 8.4. Multi-gene prognostic prediction tool (MammaPrint)

Study subjects are divided into high-risk and low-risk groups based on the results of the multi-gene prognostic prediction tool (MammaPrint).

Tumor tissue stored at the relevant institution will be used for the test. For the test, formalin-fixed, paraffin-embedded (FFPE) tissue blocks containing tumor tissue or block sections should be newly sectioned (within 1 week) at a thickness of 5 μm and provided as serial unstained slides. At least 10 slides should be provided. The cancer tissue should be fixed in 10% neutral buffered formalin, paraffin-embedded, and routinely processed for histological evaluation. Formalin substitutes are not suitable as fixatives. The tissue samples will be discarded within 3 months after the completion of the MammaPrint test, according to the laboratory regulations.

## 8.5. Administration of chemotherapy and endocrine therapy

### 8.5.1. Arm I (MammaPrint high-risk group):

Neoadjuvant chemotherapy can be selectively administered according to institutional guidelines, and premedication drugs administered prophylactically before chemotherapy can be used according to institutional guidelines.

1) AC#4 followed by Docetaxel#4 (Administered every 3 weeks)

2) AC#4 followed by weekly Paclitaxel#12
(AC is administered every 3 weeks, and Paclitaxel is administered weekly)

### 8.5.2. Arm II (MammaPrint low-risk group):

**1) For premenopausal women**, administer Leuprorelin 3.75mg subcutaneously (SQ) and have the patient revisit the hospital after 2 weeks for an E2 test.

If E2 < 20pg/ml, consider menopause induced and start endocrine therapy.

If the test results do not meet the menopause criteria, administer Leuprorelin 3.75mg SQ once more and conduct a retest after 2 weeks. If the retest results are satisfactory, start endocrine therapy; if not, withdraw the patient from the study.

Once menopause is confirmed in premenopausal women, start the following endocrine therapy:

**Letrozole 2.5mg PO QD + Leuprorelin 3.75mg SQ every 4 weeks for 16 weeks** (may be administered for up to 24 weeks if necessary, at the investigator's discretion)

**2) For postmenopausal women**, administer the following endocrine therapy:

**Letrozole 2.5mg PO QD for 16 weeks** (may be administered for up to 24 weeks if necessary, at the investigator's discretion)

## 8.6. Examinations and dose adjustments during neoadjuvant chemotherapy

### 8.6.1. Examinations during neoadjuvant chemotherapy

The following assessments should be performed on Day 1 of each cycle of neoadjuvant chemotherapy:

**1) Mandatory assessments:**

- Adverse event monitoring
- Collection of concomitant medications

**2) Optional assessments: Can be performed selectively at the investigator's discretion**

- Vital signs and weight (including body surface area)
- Performance status (ECOG performance status) and physical examination
- Complete blood count: WBC, Hemoglobin, PLT, ANC
- Comprehensive metabolic panel: calcium, phosphorus, glucose, uric acid, BUN, creatinine, cholesterol, protein, albumin, Total bilirubin, alkaline phosphatase, AST, ALT, LDH
- Serum electrolyte tests: Na, K, Cl, CO2
- Mammography, breast ultrasound, whole-body bone scan, PET, Breast MRI, or Chest CT to assess lesions
- Tumor marker test (CA15-3)
- MUGA Scan/Echocardiography

### 8.6.2. Dose adjustments during neoadjuvant chemotherapy

The conditions for starting each cycle of chemotherapy and the delay or dose adjustment of chemotherapy in case of toxicity in subjects during chemotherapy can be managed according to separate institutional guidelines.

### 8.7. Examinations and precautions during neoadjuvant endocrine therapy

The following assessments should be performed on Day 1 of each cycle of neoadjuvant endocrine therapy:

**1) Mandatory assessments:**

- Adverse event monitoring
- Collection of concomitant medications

**2) Optional assessments: Can be performed selectively at the investigator's discretion**

- Vital signs and weight (including body surface area)
- Performance status (ECOG performance status) and physical examination
- Complete blood count: WBC, Hemoglobin, PLT, ANC
- Comprehensive metabolic panel: calcium, phosphorus, glucose, uric acid, BUN, creatinine, cholesterol, protein, albumin, Total bilirubin, alkaline phosphatase, AST, ALT, LDH
- Serum electrolyte tests: Na, K, Cl, CO2
- E2 (Estradiol) test: Perform when applicable or at the investigator's discretion
- Mammography, breast ultrasound, whole-body bone scan, PET, Breast MRI, or Chest CT to assess lesions
- Tumor marker test (CA15-3)
- MUGA Scan/Echocardiography

The following precautions should be taken regarding letrozole administration during neoadjuvant endocrine therapy:

1) If the patient misses the entire daily dose, instruct them not to take an additional dose the next day.

2) If the patient vomits at any point after taking the medication, instruct them not to take an additional dose and to resume the next day's subsequent dose as prescribed.

3) If the patient accidentally takes one extra dose in a day, they should not take the dose the next day.

4) For letrozole, dose reduction is not allowed in this trial. However, if significant adverse reactions (thrombosis, embolism, heart failure, angina, significant liver dysfunction, jaundice, toxic epidermal necrolysis, erythema multiforme, etc.) occur, appropriate measures such as discontinuing letrozole should be taken.

## 8.8. Examinations at the end of neoadjuvant chemotherapy/endocrine therapy

Breast MRI or Chest CT should be performed to evaluate the primary response compared to previous examination results. Mammography and breast ultrasound should also be performed and used for additional treatment response assessment. The imaging data related to tumor response evaluation should also be forwarded to the central institutions for reassessment of the feasibility of breast-conserving surgery, and the participating institution's surgeon should establish a surgical plan based on the tumor response evaluation results. If the results received from the two central institutions are inconsistent, the authority to evaluate and make decisions will be granted to a third party (a physician or an evaluator designated by the head of the trial institution).

At the end of neoadjuvant chemotherapy or endocrine therapy, data should be collected as follows. If preoperative examinations are necessary, they should be performed according to institutional guidelines. However, if the subject discontinues treatment or drops out according to Section 8.9, other assessments except for adverse event and concomitant medication collection can be performed selectively at the investigator's discretion.

**1) Mandatory assessments:**

- Vital signs, weight (including body surface area), and physical examination
- Performance status (ECOG performance status)
- Complete blood count: WBC, Hemoglobin, PLT, ANC
- Comprehensive metabolic panel: calcium, phosphorus, glucose, uric acid, BUN, creatinine, cholesterol, protein, albumin, Total bilirubin, alkaline phosphatase, AST, ALT, LDH
- Serum electrolyte tests: Na, K, Cl
- Mammography, breast ultrasound
- Reassessment of the feasibility of breast-conserving surgery by the central institutions
- Tumor marker test (CA15-3)
- Adverse event monitoring
- Collection of concomitant medications

**2) Optional assessments: Can be performed selectively at the investigator's discretion**

- E2 (only applicable to the endocrine therapy group)
- Chest X-ray, ECG, whole-body bone scan, PET
- Breast MRI or Chest CT to assess lesions
- MUGA Scan/Echocardiography
- Serum electrolyte test: CO2

## 8.9. Criteria for treatment discontinuation or dropout

- If the planned neoadjuvant chemotherapy or endocrine therapy is not completed, the reason should be collected in the case report form. If surgery is performed after treatment discontinuation, the subject will not be withdrawn from the study, and data related to the surgery will be collected.
- If an unacceptable adverse event (AE) occurs
- If the subject withdraws consent
- If a serious violation of the clinical trial protocol occurs
- If the subject becomes pregnant
- If the subject dies
- If the subject is a premenopausal woman assigned to the endocrine therapy group and treated with Leuprorelin, but menopause is not induced
- If the investigator determines that it is medically or ethically inappropriate for the subject to continue the study for any other reason

All subjects have the right to permanently discontinue the trial treatment at any time, regardless of the reason. If a subject withdraws from the clinical trial, an end-of-treatment (EOT) visit should be conducted, and the reason for withdrawing from the trial should be confirmed and recorded in the case report form. If the subject withdraws consent for future information disclosure, all data collected before the withdrawal of consent can continue to be retained and used by the clinical trial coordinator.

## 8.10. Assessment of treatment effect and response

### 8.10.1. Evaluation of Response after Neoadjuvant Chemotherapy (RECIST Ver. 1.1)

1) Response Evaluation for Target Lesions

- **Complete Response (CR):** Disappearance of all target lesions and reduction of pathologically confirmed lymph nodes to less than 10mm (however, residual DCIS at the primary site is considered pathological refer to for complete response (pCR))
- **Partial Response (PR)**: At least a 30% decrease in the sum of the measurements of all target lesions compared to the baseline
- **Stable Disease (SD)**: Does not meet the criteria for Complete Response (CR)/Partial Response (PR) or Progressive Disease (PD)
- **Progressive Disease (PD)**: At least a 20% increase in the sum of the measurements of all target lesions compared to the smallest sum, and an absolute increase of at least 5mm or appearance of new lesions
- 2) Evaluation for Non-Target Lesions
- **Complete Response (CR)**: Disappearance of all non-target lesions and normalization of tumor marker levels, and all lymph nodes must be less than 10mm in size
- **Non-CR/Non-PD**: Persistence of one or more non-target lesions or maintenance of tumor marker levels that were elevated at baseline
- **Progressive Disease (PD):** Unequivocal progression of existing non-target lesions or appearance of new lesions

### 8.10.2. Definition of disease-free survival and overall survival

- **Disease-Free Survival (DFS):** The time from the start of the first chemotherapy to the time when disease progression is confirmed. Time of disease progression - time of recurrence in the ipsilateral breast, local recurrence, distant metastasis, occurrence of contralateral breast cancer, or occurrence of other primary tumors. If the patient dies from other causes without evidence of breast cancer progression or other primary tumors, the time until death is considered.
- **Distant Disease-Free Survival (DDFS):** The time from the start of the first chemotherapy to the time when distant metastasis is confirmed.
- **Overall Survival (OS):** The time from the start of the first chemotherapy to the time of death.

### 8.10.3. Evaluation of Toxicity

Toxicity will be evaluated according to NCI-CTCAE Version 5.0.

## 8.11. Surgical treatment

Surgical treatment should be performed within 2 months after the completion of neoadjuvant endocrine therapy or neoadjuvant chemotherapy. Partial resection and axillary lymph node dissection or modified radical mastectomy will be performed according to the extent of the lesion. After confirming the postoperative pathological examination results, reoperation may be performed according to the investigator's judgment, and information related to reoperation should also be collected through the case report form.

## 8.12. Postoperative adjuvant therapy

Adjuvant therapy performed after surgical treatment will be administered according to each hospital's adjuvant therapy guidelines, based on the investigator's judgment.

## 8.13. Radiation therapy

Radiation therapy performed after surgical treatment will follow the treatment policy of each institution.

## 8.14. Postoperative follow-up

Postoperative follow-up of subjects will be conducted for 5 years, and the following data will be collected in the case report form every 3 or 6 months according to the institutional guidelines.

- Visit date
- Presence of disease progression: If the disease has progressed, the date of disease progression
- Survival status: If the patient has died, the date of death
- Recurrence of ipsilateral breast cancer

# 9. Statistical analysis

## 9.1. Statistical objectives

The primary objective of this clinical study is to assess the breast conservation rate and overall response rate (partial response and pathological complete response: no residual cancer in both primary tumor and axillary lymph nodes, excluding residual DCIS in the primary tumor) of preoperative chemotherapy and endocrine therapy in estrogen receptor-positive, HER-2 negative stage I~IIIA breast cancer patients who are not eligible for breast-conserving surgery.

## 9.2. Definition of analysis sets

### 9.2.1. FA (Full Analysis) set

The ITT (Intention-to-treat) group refers to all subjects enrolled in the clinical trial, and the FA set refers to the group excluding subjects who did not receive the investigational product at least once or were never evaluated for the primary efficacy endpoint.

### 9.2.2. PP (Per Protocol) set

The PP set refers to the group of subjects who completed the clinical trial without any major protocol violations among the FA set. Major protocol violations are as follows:

**Violation of inclusion/exclusion criteria**

Other major protocol violations

This study will use the FA set as the primary analysis set and perform PP set analysis as a supplement if necessary.

## 9.3. Efficacy evaluation variables

For nominal variables such as breast conservation rate, clinical response rate, and pathological response rate after preoperative chemotherapy and endocrine therapy, the number of subjects, percentage, and incidence will be presented. For numeric variables such as age and white blood cell count, descriptive statistics such as mean, standard deviation, and median will be presented.

For the primary endpoint, 'expected conversion rate by preoperative chemotherapy or endocrine therapy,' statistical significance will be determined by checking whether the lower limit of the 95% confidence interval includes 0.358.

Kaplan-Meier survival curves will be estimated for disease-free survival, distant disease-free survival, and overall survival. Missing values will not be replaced by other values, and all statistical analysis results will be judged at a two-sided significance level of 5%.

# 10. Guidelines for safety

## 10.1. Definitions of safety-related terms

**10.1.1. Adverse Event (AE)**

An adverse event is any untoward medical occurrence in a patient or clinical investigation subject administered an investigational product and which does not necessarily have a causal relationship with this treatment. An adverse event can therefore be any unfavorable and unintended sign (including an abnormal laboratory finding), symptom, or disease temporally associated with the use of an investigational product, whether or not related to the investigational product. Therefore, the investigator should collect and report any new or worsening symptoms, signs, abnormal results including laboratory test abnormalities that occur after the start of the study drug administration compared to the baseline assessment. Progression of an existing disease is not recorded as an adverse event.

**10.1.2. Adverse Drug Reaction (ADR)**

An adverse drug reaction is all noxious and unintended responses to an investigational product related to any dose, where a causal relationship between the investigational product and the adverse event is at least a reasonable possibility.

**10.1.3. Unexpected Adverse Drug Reaction**

An unexpected adverse drug reaction is an adverse reaction, the nature or severity of which is not consistent with the applicable product information (e.g., Investigator's Brochure for an unapproved investigational product or package insert for an approved product).

**10.1.4. Serious AE or ADR**

A serious adverse event (experience) or reaction is any untoward medical occurrence that at any dose:

- Results in death, or is life-threatening
- Requires inpatient hospitalization or prolongation of existing hospitalization
- Results in persistent or significant disability/incapacity
- Is a congenital anomaly/birth defect
- Other important medical events besides 1) to 4), such as drug dependence/abuse, hematologic disorders, etc.

In this clinical trial, hospitalization due to the subject's voluntary will, prolongation of hospitalization due to social and administrative reasons without adverse events, hospitalization due to planned surgery or examination before participation, and hospitalization due to the progression of an existing disease are not considered serious AEs·ADRs.

Other important medical events that may not result in death, be life-threatening, or require hospitalization may be considered serious adverse events when, based upon appropriate medical judgment, they may jeopardize the patient or subject and may require medical or surgical intervention to prevent one of the outcomes listed in this definition.

## 10.2. Evaluation method and recording of adverse events

All adverse events should be recorded as new or worsening symptoms or signs from the time of study drug administration to the EOT visit. Adverse events should be assessed through physical examination, vital signs, general performance status, clinical tests, and laboratory tests.

Investigators should classify adverse events according to NCI-CTCAE version 5.0, accurately record the details and grade of the adverse event, and assess causality.

Adverse events refer collectively to unintended signs (including abnormal laboratory findings), symptoms, and temporary phenomena associated with the use of the investigational product that were not observed before participation in the clinical trial and newly appear during the administration period, regardless of causal relationship with the investigational product. Undesirable clinical signs and symptoms that occur after screening and before administration of the investigational product are recorded in the medical history and are not recorded as adverse events.

If pregnancy occurs during the clinical trial period, it is not considered a serious AE/ADR, but the subject should be withdrawn from this clinical trial, and the progress of the pregnant woman and fetus should be followed up and reported until delivery.

Expected adverse events of the investigational product (symptoms and signs, start date, duration, etc.) must be recorded without omission in the adverse event section of the case report form, and those not recorded are classified as subjective symptoms.

In principle, the investigator should evaluate the severity of adverse events in stages according to the severity of symptoms, referring to the evaluation criteria.

Adverse events that occur during the clinical trial should be followed up until they disappear, and adverse events should be investigated until the end of the trial.

Serious adverse events should be followed up for 30 days after administration of the investigational product.

## 10.3. Criteria for evaluating the severity of adverse events

When an adverse event occurs, the grade is evaluated according to the NCI-CTCAE version 5.0 criteria.

If it is an adverse event without a corresponding item, record it as "Other" in the appropriate SOC(System Organ Class), record the details, and then select the appropriate grade according to the general definition below.

**1 = Mild Adverse Event**

**2 = Moderate Adverse Event**

**3 = Severe and Undesirable Adverse Event**

**4 = Life-threatening or Disabling Adverse Event**

**5 = Death related to Adverse Event**

## 10.4. Causality

The degree of causal relationship between the administration of the study drug and the occurrence of adverse events should be determined by the investigator and evaluated according to the following criteria.

- **Certain**

The temporal relationship between drug administration/use is reasonable

It cannot be explained by other drugs, chemicals, or accompanying diseases

Clinically reasonable response upon discontinuation

Pharmacologically or phenomenologically definitive case upon re-administration

- **Probable**

The temporal relationship with drug administration/use is reasonable

It does not appear to be caused by other drugs, chemicals, or accompanying diseases

Clinically reasonable response upon discontinuation (no re-administration information)

- **Possible**

The temporal relationship with drug administration/use is reasonable

It can also be explained by other drugs, chemicals, or accompanying diseases

Information on discontinuation is insufficient or unclear

- **Unlikely**

The temporal case does not seem to have a causal relationship with drug administration/use

It can be reasonably explained by other drugs, chemicals, or potential diseases

- **Conditional/Unclassified**

More data is needed for proper evaluation or additional data is being reviewed

Unassessable/Unclassifiable

Information is insufficient or contradictory and cannot be judged, complemented, or confirmed

# 11. Funding

This research received financial support and drug from the following companies: Takeda Pharmaceutical Co., Ltd., Kwang Dong Pharmaceutical Co.,Ltd., Shin Pung Pharmaceutical Co., Ltd., HyupJin corporation and Agendia, Inc.

# 12. Conflict of interest

HBL and WH are co-founders and members of the DCGen Co., Ltd board of directors. HBL received research funding from Devicor Medical Product, Inc., and consulting fees from Need Inc., outside the current work.

# 13. References

1. Fisher B, Bryant J, Wolmark N, Mamounas E, Brown A, Fisher ER, et al. Effect of preoperative chemotherapy on the outcome of women with operable breast cancer. J ClinOncol. 1998;16:2672–85.

2. Wolmark N, Wang J, Mamounas E, Bryant J, Fisher B. Preoperative chemotherapy in patients with operable breast cancer: nine-year results from National Surgical Adjuvant Breast and Bowel Project B-18. J Natl Cancer InstMonogr. 2001;30:96–102.

3. van der Hage JA, van de Velde CJ, Julien JP, Tubiana-Hulin M, Vandervelden C, Duchateau L. Preoperative chemotherapy in primary operable breast cancer: results from the European Organization for Research and Treatment of Cancer Trial 10902. J ClinOncol. 2001;19:4224–37.

4. Toi M, Nakamura S, Kuroi K, Iwata H, Ohno S, Masuda N, et al. Japan Breast Cancer Research Group (JBCRG), phase II study of preoperative sequential FEC and docetaxel predicts of pathological response and disease free survival. Breast Cancer Res Treat. 2008;110:531–9.

5. Guarneri V, Broglio K, Kau SW, Cristofanilli M, Buzdar AU, Valero V, et al. Prognostic value of pathologic complete response after primary chemotherapy in relation to hormone receptor status and other factors. J ClinOncol. 2006;24:1037–44.

6. Francis PA, Regan MM, Fleming GF, Lang I, Ciruelos E, Bellet M, et al. Adjuvant ovarian suppression in premenopausal breast cancer. N Engl J Med. 2015;372(5):436-46.

7. Charehbili A, Fontein DB, Kroep JR, Liefers GJ, Mieog JS, Nortier JW *et al*: Neoadjuvant hormonal therapy for endocrine sensitive breast cancer: a systematic review. *Cancer treatment reviews* 2014, 40(1):86-92.

8. Mieog JS, van der Hage JA, van de Velde CJ: Neoadjuvant chemotherapy for operable breast cancer. *The British journal of surgery* 2007, 94(10):1189-1200.

9. Mauri D, Pavlidis N, Ioannidis JP: Neoadjuvant versus adjuvant systemic treatment in breast cancer: a meta-analysis. *Journal of the National Cancer Institute* 2005, 97(3):188-194.

10. Alba E, Calvo L, Albanell J, De la Haba JR, Arcusa Lanza A, Chacon JI *et al*: Chemotherapy (CT) and hormonotherapy (HT) as neoadjuvant treatment in luminal breast cancer patients: results from the GEICAM/2006-03, a multicenter, randomized, phase-II study. *Annals of oncology : official journal of the European Society for Medical Oncology / ESMO* 2012, 23(12):3069-3074

.

11. Semiglazov VF, Semiglazov VV, Dashyan GA, Ziltsova EK, Ivanov VG, Bozhok AA *et al*: Phase 2 randomized trial of primary endocrine therapy versus chemotherapy in postmenopausal patients with estrogen receptor-positive breast cancer. *Cancer* 2007, 110(2):244-254.

12. Cataliotti L, Buzdar AU, Noguchi S, Bines J, Takatsuka Y, Petrakova K *et al*: Comparison of anastrozole versus tamoxifen as preoperative therapy in postmenopausal women with hormone receptor-positive breast cancer: the Pre-Operative "Arimidex" Compared to Tamoxifen (PROACT) trial. *Cancer* 2006, 106(10):2095-2103.

13. Eiermann W, Paepke S, Appfelstaedt J, Llombart-Cussac A, Eremin J, Vinholes J *et al*: Preoperative treatment of postmenopausal breast cancer patients with letrozole: A randomized double-blind multicenter study. *Annals of oncology : official journal of the European Society for Medical Oncology / ESMO* 2001, 12(11):1527-1532.

14. Masuda N, Sagara Y, Kinoshita T, Iwata H, Nakamura S, Yanagita Y *et al*: Neoadjuvant anastrozole versus tamoxifen in patients receiving goserelin for premenopausal breast cancer (STAGE): a double-blind, randomised phase 3 trial. *The lancet oncology* 2012, 13(4):345-352.

15. Smith IE, Dowsett M, Ebbs SR, Dixon JM, Skene A, Blohmer JU *et al*: Neoadjuvant treatment of postmenopausal breast cancer with anastrozole, tamoxifen, or both in combination: the Immediate Preoperative Anastrozole, Tamoxifen, or Combined with Tamoxifen (IMPACT) multicenter double-blind randomized trial. *Journal of clinical oncology : official journal of the American Society of Clinical Oncology* 2005, 23(22):5108-5116.

16. Ellis MJ, Suman VJ, Hoog J, Lin L, Snider J, Prat A *et al*: Randomized phase II neoadjuvant comparison between letrozole, anastrozole, and exemestane for postmenopausal women with estrogen receptor-rich stage 2 to 3 breast cancer: clinical and biomarker outcomes and predictive value of the baseline PAM50-based intrinsic subtype--ACOSOG Z1031. *Journal of clinical oncology : official journal of the American Society of Clinical Oncology* 2011, 29(17):2342-2349.

17. Kataja V, Castiglione M, Group EGW: Primary breast cancer: ESMO clinical recommendations for diagnosis, treatment and follow-up. *Annals of oncology : official journal of the European Society for Medical Oncology / ESMO* 2009, 20 Suppl 4:10-14.

18. Gnant M, Mlineritsch B, Schippinger W, Luschin-Ebengreuth G, Postlberger S, Menzel C *et al*: Endocrine therapy plus zoledronic acid in premenopausal breast cancer. *The New England journal of medicine* 2009, 360(7):679-691.

19. Magon N: Gonadotropin releasing hormone agonists: Expanding vistas. *Indian Journal of Endocrinology and Metabolism* 2011, 15(4):261-7.

20. Roth C, Hegemann F, Hildebrandt J, Balzer I, Witt A, Wuttke W *et al*: Pituitary and gonadal effects of GnRH(gonadotropin releasing hormone) analogues in two peripubertal female rat models. *Pediatric Research* 2004, 55(1):126-33.

21. Fatima C, Laura JV, Jan B, Leen S, Giuseppe V, Suzette D, *et al*: 70-Gene Signature as an Aid to Treatment Decisions in Early Stage Breast Cancer. *New England Journal of Medicine* 2016, 375:717-29.
